RESEARCH ARTICLE

# SOX10 Transactivates S100B to Suppress Schwann Cell Proliferation and to Promote Myelination

Sayaka Fujiwara<sup>1</sup>, Shinya Hoshikawa<sup>1</sup>, Takaaki Ueno<sup>1</sup>, Makoto Hirata<sup>1</sup>, Taku Saito<sup>2</sup>, Toshiyuki Ikeda<sup>1</sup>, Hiroshi Kawaguchi<sup>1</sup>, Koza Nakamura<sup>1</sup>, Sakae Tanaka<sup>1</sup>, Toru Ogata<sup>3\*</sup>

1. Departments of Sensory & Motor System Medicine, Faculty of Medicine, University of Tokyo, Tokyo, Japan, 2. Bone and Cartilage Regenerative Medicine, Faculty of Medicine, University of Tokyo, Tokyo, Japan, 3. Department of Rehabilitation for the Movement Functions, Research Institute, National Rehabilitation Center for Persons with Disabilities, Saitama, Japan

\*ogata-toru@rehab.go.jp

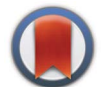

CrossMark  
click for updates

**OPEN ACCESS**

**Citation:** Fujiwara S, Hoshikawa S, Ueno T, Hirata M, Saito T, et al. (2014) SOX10 Transactivates S100B to Suppress Schwann Cell Proliferation and to Promote Myelination. PLoS ONE 9(12): e115400. doi:10.1371/journal.pone.0115400

**Editor:** Petri Kursula, University of Oulu, Finland

**Received:** July 17, 2014

**Accepted:** November 21, 2014

**Published:** December 23, 2014

**Copyright:** © 2014 Fujiwara et al. This is an open-access article distributed under the terms of the [Creative Commons Attribution License](http://creativecommons.org/licenses/by/4.0/), which permits unrestricted use, distribution, and reproduction in any medium, provided the original author and source are credited.

**Data Availability:** The authors confirm that all data underlying the findings are fully available without restriction. All relevant data are contained within the paper.

**Funding:** This study was supported by a Grant-in-aid for Scientific Research from the Japanese Ministry of Education, Culture, Sports, Science, and Technology (#23300204). <http://www.jsps.go.jp/english/index.html>. This grant has been received by TO. The funders had no role in study design, data collection and analysis, decision to publish, or preparation of the manuscript.

**Competing Interests:** The authors have declared that no competing interests exist.

## Abstract

Schwann cells are an important cell source for regenerative therapy for neural disorders. We investigated the role of the transcription factor sex determining region Y (SRY)-box 10 (SOX10) in the proliferation and myelination of Schwann cells. SOX10 is predominantly expressed in rat sciatic nerve-derived Schwann cells and is induced shortly after birth. Among transcription factors known to be important for the differentiation of Schwann cells, SOX10 potently transactivates the *S100B* promoter. In cultures of Schwann cells, overexpressing SOX10 dramatically induces S100B expression, while knocking down SOX10 with shRNA suppresses S100B expression. Here, we identify three core response elements of SOX10 in the *S100B* promoter and intron 1 with a putative SOX motif. Knockdown of either SOX10 or S100B enhances the proliferation of Schwann cells. In addition, using dissociated cultures of dorsal root ganglia, we demonstrate that suppressing S100B with shRNA impairs myelination of Schwann cells. These results suggest that the SOX10-S100B signaling axis critically regulates Schwann cell proliferation and myelination, and therefore is a putative therapeutic target for neuronal disorders.

## Introduction

Schwann cells have recently attracted great attention as a cell source for regenerative therapy for various kinds of neuronal disorders. Therefore, it is now crucial to elucidate the mechanisms of Schwann cell differentiation and function.

Previous studies have clarified the role of various cytokines in Schwann cell proliferation and differentiation [1]. In addition, the developmental expression pattern of Schwann cell differentiation markers such as S100, nerve growth factor receptor (NGFR, also known as p75NTR), myelin associated glycoprotein (MAG), and myelin protein zero (MPZ, also known as P0), as well as transcription factors such as SOX10, paired box 3 (PAX3), POU class 3 homeobox 1 (POU3F, also known as Oct6), and early growth response 2 (EGR2, also known as KROX20) have been extensively studied [2, 3].

SOX family transcription factors are known to be involved in determining cell fate. Among the family members, SOX9 and SOX10 are involved in neural crest cell (NCC) migration and subsequently determining cell fate between neurons and Schwann cells [4–6]. Although the exact role of SOX10 in Schwann cell development still remains elusive, SOX10 is expressed from the early NCC stage through all stages of Schwann cell development and into adulthood [7].

S100 family proteins are abundantly expressed in glial cells, and some of the family members are implicated in a variety of intracellular and extracellular functions [8]. In the central nervous system (CNS), S100B promotes proliferation and inhibits differentiation of astrocytes [9], and increases in S100B are associated with neural diseases such as amyotrophic lateral sclerosis, multiple sclerosis, depression, Alzheimer's disease, and schizophrenia [10–13]. In addition, patients with Down's syndrome caused by chromosome 21 trisomy exhibit excessive expression of S100B, whose gene coding region is located on chromosome 21 [12, 14]. The expression of S100B gradually increases during Schwann cell differentiation [15, 16], and we previously reported that S100B expression is induced by SOX9 in chondrocytes [17]. Some studies point to an association between SOX10 and S100B; for instance, knockdown of SOX10 in Schwannoma cells drastically reduces S100B levels [18]. Waardenburg-Shah syndrome type 4, in which SOX10 mutations are observed, causes myelination disorders and peripheral neuropathy [19, 20]. Hirschsprung disease, also characterized by SOX10 mutations, causes the absence of the myenteric plexus where S100B is usually expressed [21]. In the present study, we identify S100B as one of the transcriptional targets of SOX10 during the differentiation of Schwann cells. We further found that the SOX10-S100B signaling axis regulates the proliferation and myelination of Schwann cells.

## Materials and Methods

### Cell cultures

All mouse experiments were performed according to the protocol approved by the Animal Care and Use Committee of the University of Tokyo. Carbon dioxide and decapitation were applied to euthanize adult and embryo rats, respectively. Primary rat Schwann cells were isolated and cultured as previously reported [22]. Briefly, we harvested Schwann cells from sciatic nerves of Wistar rats at postnatal day 2 (P2) and cultured the cells in DMEM containing 10% FBS and we added

10  $\mu$ M AraC to the medium on the next day to eliminate contamination from fibroblasts. After 48 h, we replaced the medium with DMEM containing 3% FBS with 3  $\mu$ M forskolin and 20 ng/mL neuregulin to expand the cells. We subcultured the cells by re-plating them onto poly-L-lysine-coated plastic dishes before confluence. We used Schwann cells between passages 3 and 7 in all experiments. For retrovirus infection, cells were incubated with DMEM containing retroviral vectors for 2 h, and then the medium was changed to DMEM with 10% FBS and cultured for an additional 48 h. Primary chondrocytes were isolated from the ribs of mouse embryos and cultured in DMEM with 10% FBS as previously described [23].

### Luciferase reporter assay

We cloned rat *S100b* promoter region from  $-1,000$  to  $+200$  bp relative to the transcriptional start site into the pGL3-Basic vector (Promega). We created deletion and mutation constructs by PCR. We cultured Schwann cells in medium containing 2 mM forskolin and 2 nM recombinant neuregulin (rh-HRG-1; Genzyme) before the transfection with the constructs and in medium with 2 mM forskolin and without neuregulin after the transfection. We performed luciferase assays with the PicaGene Dual SeaPansy Luminescence Kit (Toyo Ink) and present data as the ratio of the firefly activity to the Renilla activity.

### Chromatin immunoprecipitation (ChIP) assays

We performed ChIP assays in primary rat Schwann cells with an EZ ChIP kit (Upstate) as described by the manufacturer. Briefly, we obtained DNA, crosslinked to protein with formaldehyde, and sheared the DNA by pulsed ultrasonication. For immunoprecipitation, we used an anti-SOX10 antibody (Santa Cruz) or a rabbit IgG antibody (negative control). Primer sets, spanning the identified response element, ranged from  $-421$  to  $-157$  bp (site AB), from  $-421$  to  $-224$  bp (site A), from  $-285$  to  $-46$  bp (site B), and from  $-78$  to  $+169$  bp (site D) relative to the transcriptional start site.

### Plasmids and viral vectors

We prepared shRNA vectors for rat *S100b*, rat *Sox10*, *GFP* and *luciferase* in piGENE mU6 vectors (iGENE Therapeutics). The sequence information of oligonucleotides synthesized for RNAi is available upon request. We subcloned the mouse U6 gene promoter and shRNA sequence from piGENE mU6 vectors into pMX-puro vectors to generate retroviral vectors as previously described [24].

### Real-time RT-PCR

We isolated total RNA from primary rat Schwann cells using Isogen (Wako) and an RNeasy Mini Kit (Qiagen). We used 1  $\mu$ g of total RNA for a reverse transcription reaction with the QuantiTect Reverse Transcription kit (Qiagen) to

generate single-stranded cDNA. We performed real-time PCR assays based on SYBR Green detection with the ABI Prism 7000 Sequence Detection system (Applied Biosystems). Copy numbers of target gene mRNA in each total RNA were calculated by reference to standard curves and were adjusted to the standard total RNA (Applied Biosystems), using beta-actin for normalization [17, 25]. We observed that the Ct values of the standard vector samples of each gene were similar to each other. All reactions were run in triplicate. Primer sequence information is available upon request.

### Western blotting

We lysed rat Schwann cells in M-Per mammalian protein extraction reagent (Pierce) containing a complete mini protease inhibitor cocktail tablet (Roche). For immunoblot analysis, lysates were fractionated by SDS-PAGE and transferred onto PVDF membranes (BIO-RAD). The membranes were incubated with an antibody to S100B (SH-B1, Sigma-Aldrich), SOX10 (N-20, Santa Cruz), or  $\beta$ -actin (Sigma-Aldrich). The immunoblots were developed by using the ECL system (Amersham Biosciences).

### Cell proliferation assay

We seeded Schwann cells at  $10^3$  cells per well in a 96-well plate and evaluated cell proliferation by the modified MTT method designated WST-8 as indicated in the manufacturer's instruction (Dojindo Laboratories) at the indicated time point. The absorbance of the product at the 490-nm wavelength was measured using an automated microplate reader (Bio-Tek Instruments). For BrdU detection analysis, we labeled the Schwann cells with 10  $\mu$ M BrdU (Sigma) for 18 h and the cells were stained using a BrdU Immunohistochemistry System (Calbiochem). The cells were counterstained with the nuclear stain DAPI. The percentage of cells that had incorporated BrdU was quantified by determining the ratio of BrdU-positive nuclei and the total number of nuclei in 15 systematically sampled microscope fields.

### Myelination assay

We used dorsal root ganglion (DRG) neuronal coculture with Schwann cells as previously described [26]. Briefly, we isolated DRGs from embryonic rats at embryonic day (E) 15, dissociated with trypsin, and seeded them on 12-mm dishes coated with collagen type I at 200,000 cells per well. Non-neuronal cells were removed by treating cultures with C media (MEM, 10% FBS, 0.4% glucose, and 100 ng/mL 2.5S NGF) supplemented with 5-fluorodeoxyuridine, uridine, and AraC (10  $\mu$ M) or with C media alone every 2–3 days alternately for 10 days. For myelination, 250,000 retrovirally-infected Schwann cells were seeded onto DRG cultures in DMEM/F12 medium with N2 supplement (Gibco) and 50 ng/mL NGF and kept for several days until Schwann cells populated axons. The medium was

then switched to C media with 50 ng/mL ascorbic acid to promote myelination. Cocultures were kept for 2 weeks and then fixed with 4% paraformaldehyde. Anti-myelin basic protein (MBP) and anti-Tuj1 antibodies diluted at 1:200 in TBST with 3% BSA were applied overnight at room temperature. Fluorescently-labeled secondary antibodies, Alexa Fluor 488 or 568, diluted at 1:500 in TBST were then added to observe myelin-forming Schwann cells with fluorescence microscopy. The number of myelin-forming Schwann cells was counted by surveying 20 fields at 200× magnification from three independent experiments and expressed as a percentage ratio of control cultures.

### Statistical analysis

Group means were compared by ANOVA, and significance of differences were determined by post-hoc testing using Bonferroni's method.

## Results

### Expression of *Sox10* and *S100b* during Schwann cell differentiation

As shown in [Fig. 1](#), *Sox10* was predominantly expressed in primary rat Schwann cells as compared to *Sox9* ([Fig. 1A](#)), while *Sox9* was highly expressed in primary rat rib chondrocytes as compared to *Sox10* ([Fig. 1B](#)). We then analyzed the expression of *Sox10* and other factors known to be involved in Schwann cell development in rat DRG at E15 and rat sciatic nerve at 2, 7, and 12 days after birth. *Sox10* expression markedly increased after birth and gradually decreased thereafter ([Fig. 1C](#)). The expressions of *S100b*, *Mpz*, *Mag*, *Periaxin (Prx)*, and *Mbp* were induced after birth following *Sox10* induction ([Fig. 1C](#)).

### Regulation of S100B by SOX10

To investigate the regulation of S100B by SOX10 in Schwann cells, we retrovirally overexpressed SOX10 in primary rat sciatic Schwann cells and rat osteosarcoma ROS cells ([Fig. 2A](#), top). The expression level of S100B was significantly increased in SOX10-overexpressing Schwann cells ([Fig. 2A](#), bottom and B), as well as in SOX10-overexpressing ROS cells ([Fig. 2C](#)). Conversely, when we suppressed SOX10 expression with a specific shRNA, the expression of S100B and *Mpz* was significantly suppressed ([Fig. 3](#)). These results suggest that SOX10 regulates S100B expression in Schwann cells.

We then analyzed the promoter activity of human *S100B* using human HeLa cells transfected with a luciferase reporter gene construct containing a 5'-flanking sequence from -1,000 to +200 bp relative to the transcriptional start site of *S100B*. Among the transcription factors known to regulate Schwann cell differentiation, such as EGR2, POU3F, PAX3, and SOX10, SOX10 most potently enhanced transcriptional activity ([Fig. 4A](#)). Deletion analysis by a series of 5'-deletion constructs identified the location of the SOX10 response element between

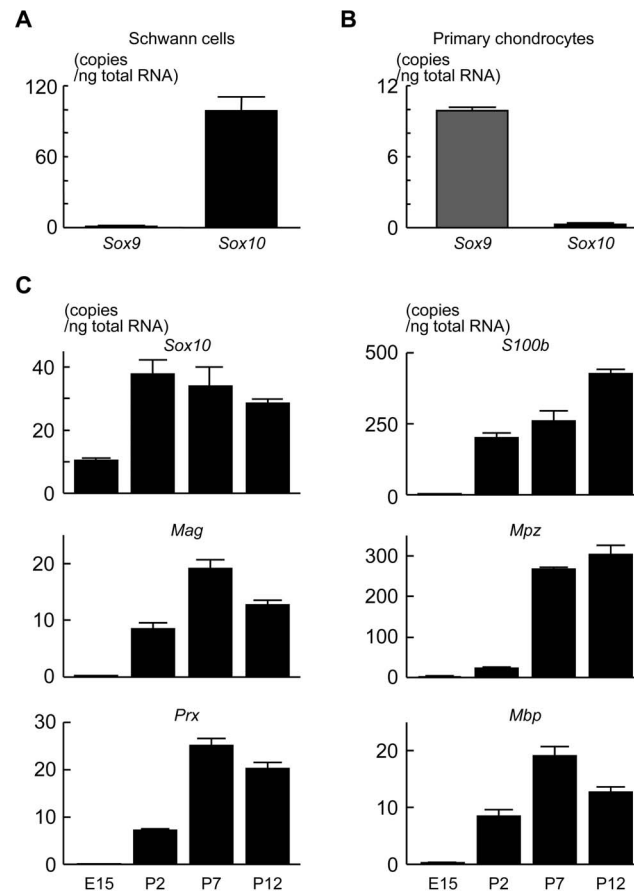

**Fig. 1. Expression pattern of Sox10 and other differentiation markers in Schwann cells.** (A and B) Comparison of expression level between Sox10 and Sox9 in primary rat sciatic nerve Schwann cells and primary rat rib chondrocytes. (C) Time course of mRNA levels of Schwann cell differentiation markers determined by real-time RT-PCR analysis during rat perinatal stages. All experiments were repeated independently three times with data shown as the mean (bars)  $\pm$  SEM (error bars).

doi:10.1371/journal.pone.0115400.g001

–334 and –240-bp (Fig. 4B). This region has been reported as a Sox10 binding site in ChIP-Seq analysis by Srinivasan et al. [27] and contains three putative consensus sites for SOX10, each of which was highly conserved among species like human, rat, and mouse (sites A, B, and C) (Fig. 4C). Site-directed mutagenesis of sites A and B but not of site C significantly suppressed transactivity of SOX10 (Fig. 4D). Deletion analysis using a 3'-deletion construct and site-directed mutagenesis demonstrated another putative SOX10-response element in the first intron (site D) (Fig. 5A–5B). A ChIP assay demonstrated the direct binding of SOX10 to the SOX motifs in sites A, B, and D (Fig. 5C).

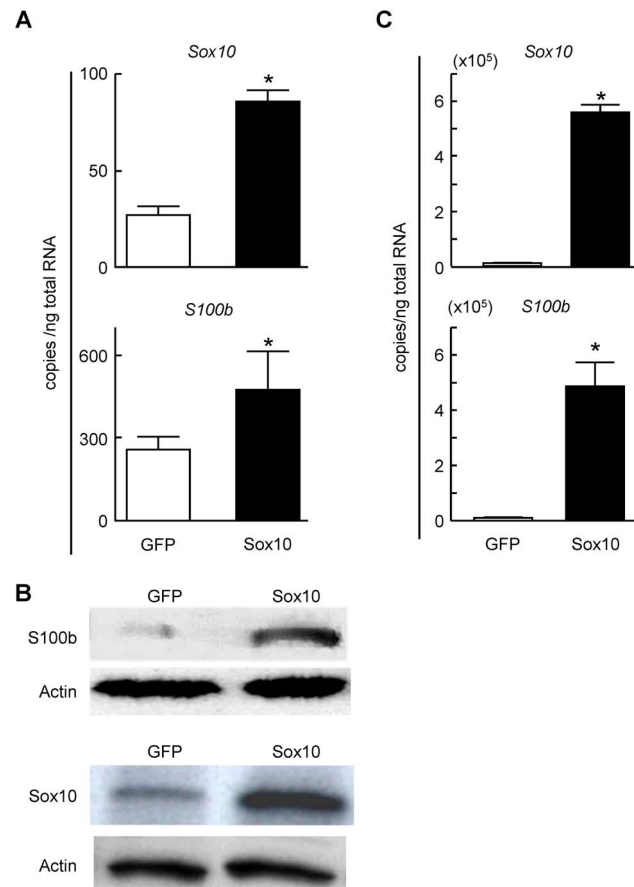

**Fig. 2. Modulation of S100B expression by SOX10 in Schwann cells.** (A) mRNA levels of *Sox10* (top) and *S100b* (bottom) in stable lines of primary rat Schwann cells retrovirally transfected with SOX10 or control GFP. (B) Protein level of S100B and Sox10 in stable lines of primary rat Schwann cells retrovirally transfected with SOX10 or control GFP. (C) Modulation of *S100b* expression by SOX10 in ROS cells. mRNA levels of *Sox10* (top) and *S100b* (bottom) in stable lines of rat non-neurogenic ROS cells retrovirally transfected with SOX10 or control GFP. Experiments were repeated independently three times with data shown as the mean  $\pm$  SEM. \* $P < 0.05$  versus control.

doi:10.1371/journal.pone.0115400.g002

### Contribution of SOX10-S100B signaling to proliferation and myelination of Schwann cells

We next examined the function of S100B in the proliferation of Schwann cells. When Schwann cells were cultured under the proliferation or differentiation conditions, i.e., with or without NGF and forskolin treatment, respectively [28], the expression of both *Sox10* and *S100b* was markedly suppressed under the proliferation condition but increased under the differentiation condition (Fig. 6). When we knocked down either *S100b* or *Sox10* with shRNA, BrdU incorporation significantly increased (Fig. 7A–B, 7D–E). In the CCK-8 assay, knocking down either *S100b* or *Sox10* in the Schwann cells or non-glia cells (C3H10T1/2) also increased cell proliferation (Fig. 7C and Fig. 8). These results suggest that SOX10-S100B signaling negatively regulates Schwann cell proliferation.

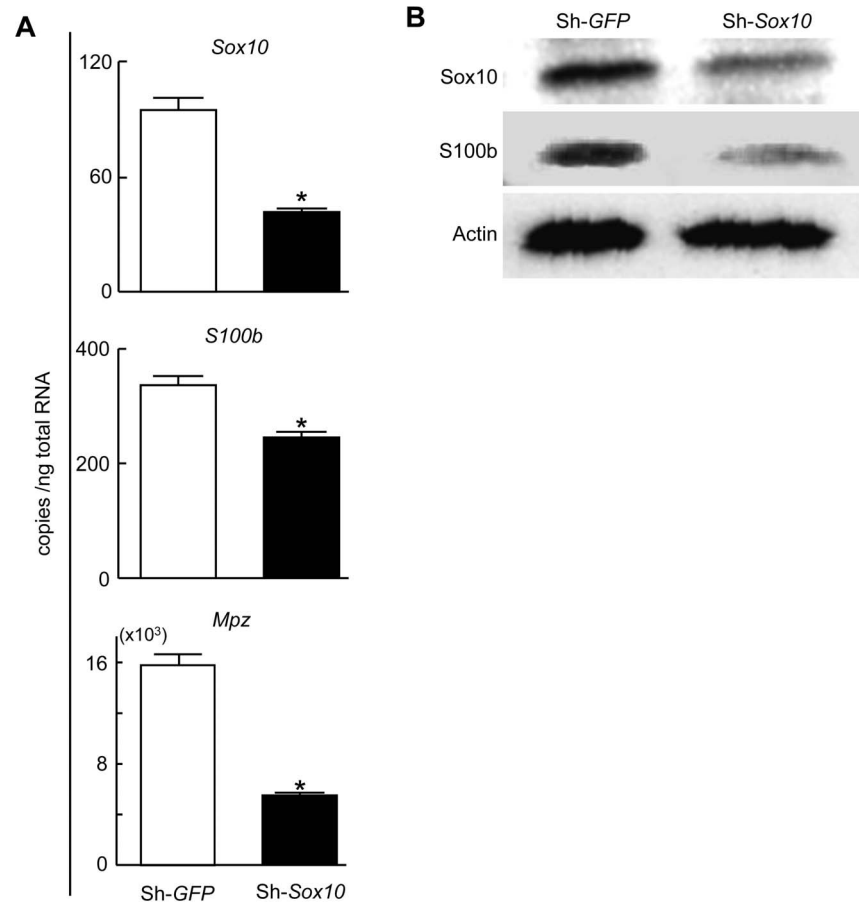

**Fig. 3. Suppression of S100B and Mpz expression by SOX10 insufficiency in Schwann cells.** (A) mRNA levels of *Sox10* (top), *S100b* (middle) and *Mpz* (bottom) in stable lines of primary rat Schwann cells retrovirally transfected with shRNA specific for *Sox10* or *GFP*. All experiments were repeated independently three times with data shown as the mean  $\pm$  SEM. \* $P < 0.05$  versus *GFP* or sh-*GFP*. (B) Protein levels of SOX10 and S100B in stable lines of primary rat Schwann cells retrovirally transfected with shRNA specific for SOX10 or control *GFP*.

doi:10.1371/journal.pone.0115400.g003

Finally, we examined the involvement of S100B in myelination using dissociated DRGs. Compared to control cocultures, knocking down *S100b* in Schwann cells impaired the myelination of rat DRG neurons (Fig. 9A), and we quantified this by calculating the number of MBP-positive myelinating cells (Fig. 9B). This result suggests that S100B in Schwann cells plays a critical role in myelination.

## Discussion

During vertebrate development, SOX10 is first highly expressed in the emerging neural crest and later in glial cells, where SOX10 is involved in the differentiation of both the peripheral nervous system (PNS) and CNS [7, 29]. SOX10 also plays an essential role in maturing and maintaining Schwann cells [30] by directly



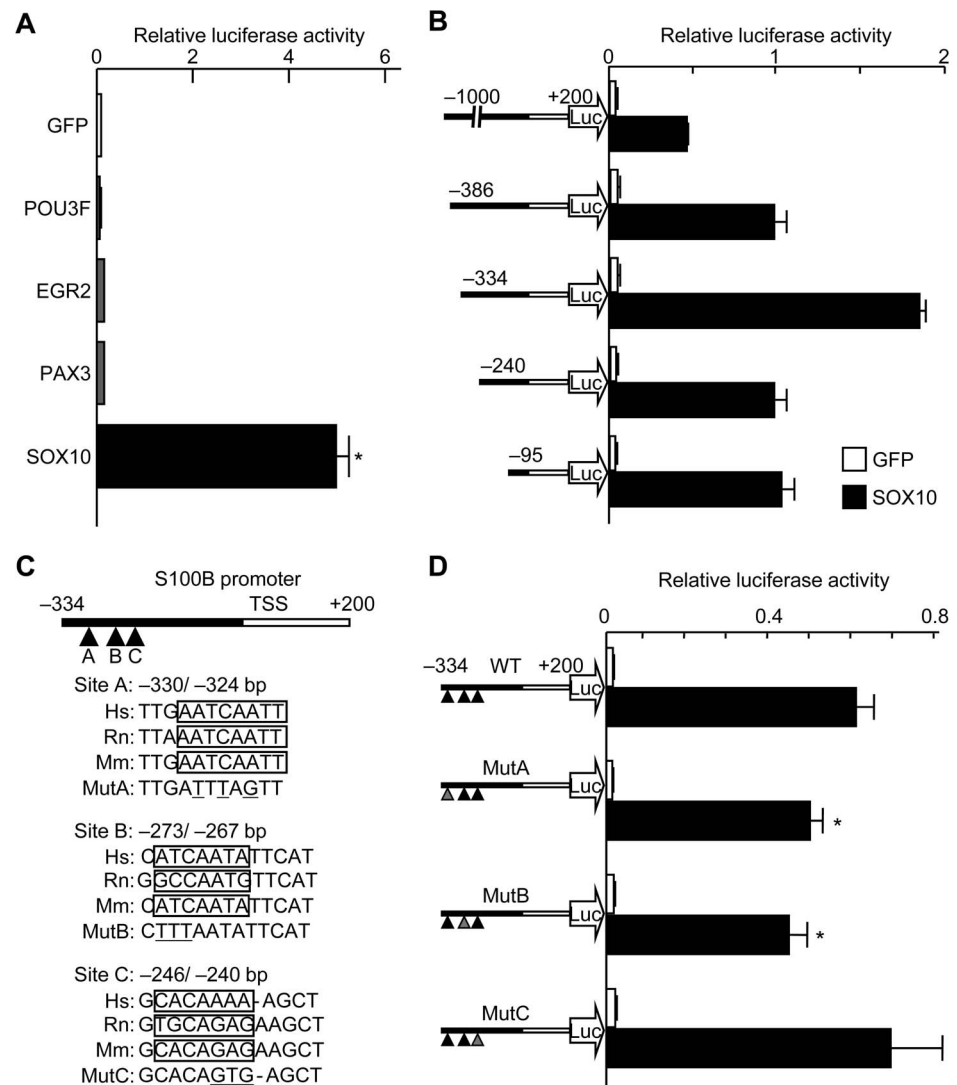

**Fig. 4. Identification of putative SOX10-response elements in S100B.** (A) Luciferase activities after transfection of putative Schwann cell-related transcription factors into HeLa cells with a reporter construct containing a fragment (−1,000 to +200 bp) of the *S100B* gene. \* $P < 0.05$  versus GFP. (B) Deletion analysis using luciferase-reporter constructs containing a series of deletion fragments of the *S100B* gene in HeLa cells transfected with SOX10 or control GFP. (C) Comparison of human (Hs), rat (Rn), and mouse (Mm) sequences in three putative SOX motifs in the *S100B* promoter and mutated sequences (Mut A, Mut B, and Mut C), used in the following mutagenesis analysis. (D) Site-directed mutagenesis analysis using luciferase-reporter constructs containing −334 to +200 bp of the *S100B* gene with mutations as in Fig. 3C within the three SOX motifs in the cells above. \* $P < 0.05$  versus wild-type (WT) with SOX10. All experiments were repeated independently three times with data shown as the mean  $\pm$  SEM.

doi:10.1371/journal.pone.0115400.g004

regulating MPZ, c-Ret, ciliary neurotrophic factor (CNTF), dopachrome tautomerase (DCT), microphthalmia-associated transcription factor (MITF), connexin32, connexin47, EGR2, SP1, and SP3 [31–39]. In the present study, we demonstrated that during Schwann cell differentiation, SOX10 is involved in the transcriptional induction of *S100B*. SOX10 belongs to the SOX transcription

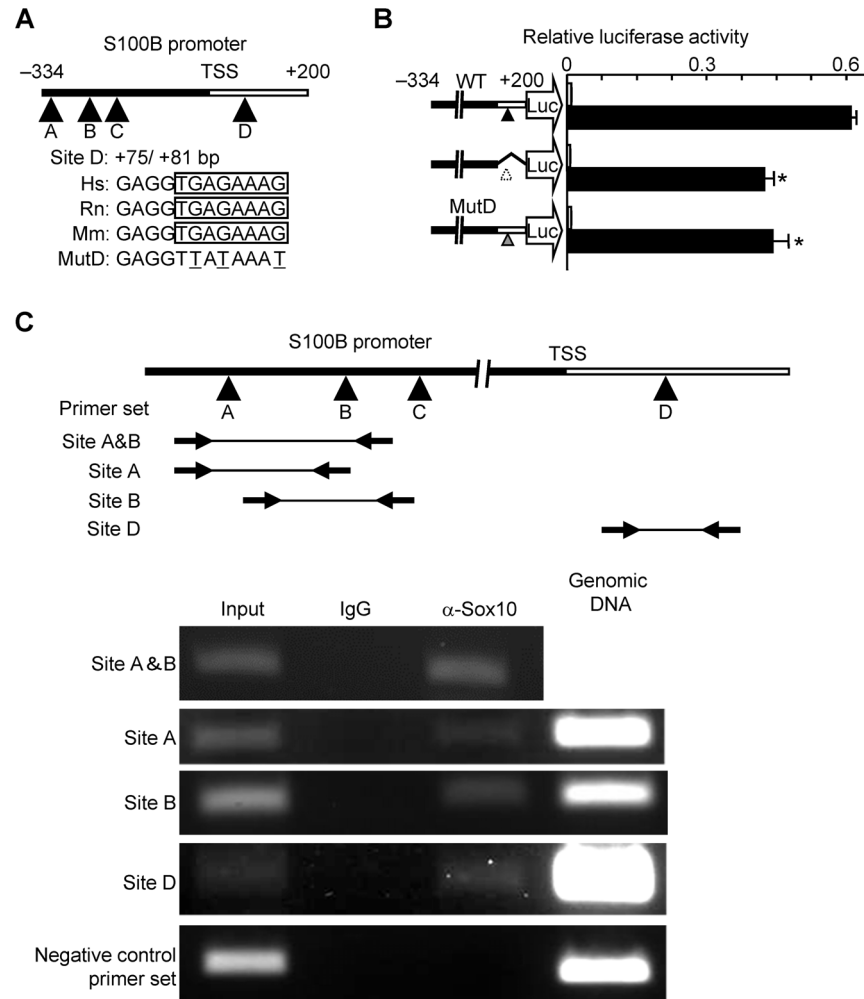

**Fig. 5. Identification of putative response elements in S100B intron 1 by SOX10 and direct binding of SOX10 to the response elements.** (A) Comparison of human (Hs), rat (Rn) and mouse (Mm) sequences in the putative SOX motif of the S100B intron 1 and mutated sequence (Mut D), used in the following mutagenesis analysis. (B) Deletion and site-directed mutagenesis analysis using luciferase-reporter constructs containing  $-334$  to  $+200$  bp of the *S100B* gene in HeLa cells transfected with SOX10 or control GFP. \* $P < 0.05$  versus wild-type (WT) with SOX10. All experiments were repeated independently three times with data shown as the mean  $\pm$  SEM. (C) ChIP assay performed using cell lysates of Schwann cells that were amplified by a primer set spanning the identified regions; sites A & B (top), site A (second row), site B (third row), and site D (fourth row), or not spanning the region (bottom) before (input) and after immunoprecipitation with antibodies to Sox10 ( $\alpha$ -Sox10) or non-immune IgG (IgG). Genomic DNA was amplified as a positive control.

doi:10.1371/journal.pone.0115400.g005

factor family that contains high-mobility group (HMG) domain(s) [40, 41]. The SoxE family contains SOX10, SOX9, and SOX8. The family members are structurally similar and are known to have functional redundancies [42, 43]. We previously reported that SOX9 regulates S100B expression in chondrocytes through direct binding to the *S100b* promoter(s) [17]. Here, we found that *Sox10* is predominantly expressed in Schwann cells as compared to *Sox9* (Fig. 1A), and the expression levels of SOX8 and SOX9 are lower than that of SOX10 in

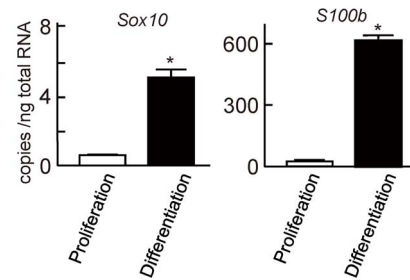

**Fig. 6. Suppressed Schwann cell proliferation by SOX10-S100B signaling.** Comparison of *Sox10* and *S100b* mRNA levels between conditions of proliferation and differentiation in rat sciatic nerve Schwann cells. All experiments were repeated independently three times with data shown as the mean  $\pm$  SEM. \* $P < 0.05$  versus proliferation condition.

doi:10.1371/journal.pone.0115400.g006

differentiated glial cells [36]. In addition, previous reports showed that the expression of S100B as well as MZP and MBP is suppressed in SOX10-deficient sciatic nerves [30]. Therefore, in the present study, we focused on the role of SOX10 in Schwann cell differentiation.

It has been reported that SOX transcription factors determine cell fate by enhancing transcriptional activity through interaction with their co-factors; several factors such as PAX3 [33], SP1, SP3, heterogeneous nuclear ribonucleo-protein K, pur-alpha [35], MITF [34], EGR2 [31, 36], and POU3F [44] have already been shown to function as co-factors of SOX10. In addition, because *Sox10* has several known targets, such as *Krox20/Egr2* and *ErbB3*, we could not exclude the possibility that these molecules also play a role in the regulation of proliferation and differentiation together with S100B. The cooperation of SOX10 with other factors should be analyzed to elucidate the mechanism of S100B induction in Schwann cells in further detail.

Although S100B is involved in energy metabolism, cell cycling, apoptosis, extracellular signaling, and regulating the cytoskeleton [11, 45, 46], its function in Schwann cells has not been fully clarified. We found that the expression of SOX10 and S100B was decreased under the proliferation condition, while it was increased under the differentiation condition (Fig. 6A). Moreover, knockdown of SOX10 or S100B increased the proliferation of Schwann cells (Figs. 6B, 7A–7B). A previous report showed a significant increase in the number of proliferating cells in the sciatic nerve from Schwann cell-specific *Sox10*-ablated mice [30]. By analyzing cyclin-dependent kinase (Cdk)-deficient mice, it was discovered that Cdk4 controls postnatal Schwann cell proliferation [47], although the exact role of SOX10 or S100B as a regulator of cell cycle-related molecules in Schwann cells has not been established. Interestingly, S100B promotes cell cycling in the CNS [9] and S100B levels are high in neuronal tumor cells as compared to normal parental cells. Nevertheless, other studies demonstrated that the Cdk inhibitor p21<sup>WAF1</sup> was induced by S100B via AKT activation in PC12 neuronal cells [48] and that another Cdk inhibitor, p27<sup>Kip1</sup>, activated the MBP promoter in cooperation with SOX10 in oligodendrocytes [49]. Therefore, SOX10-S100B signaling may

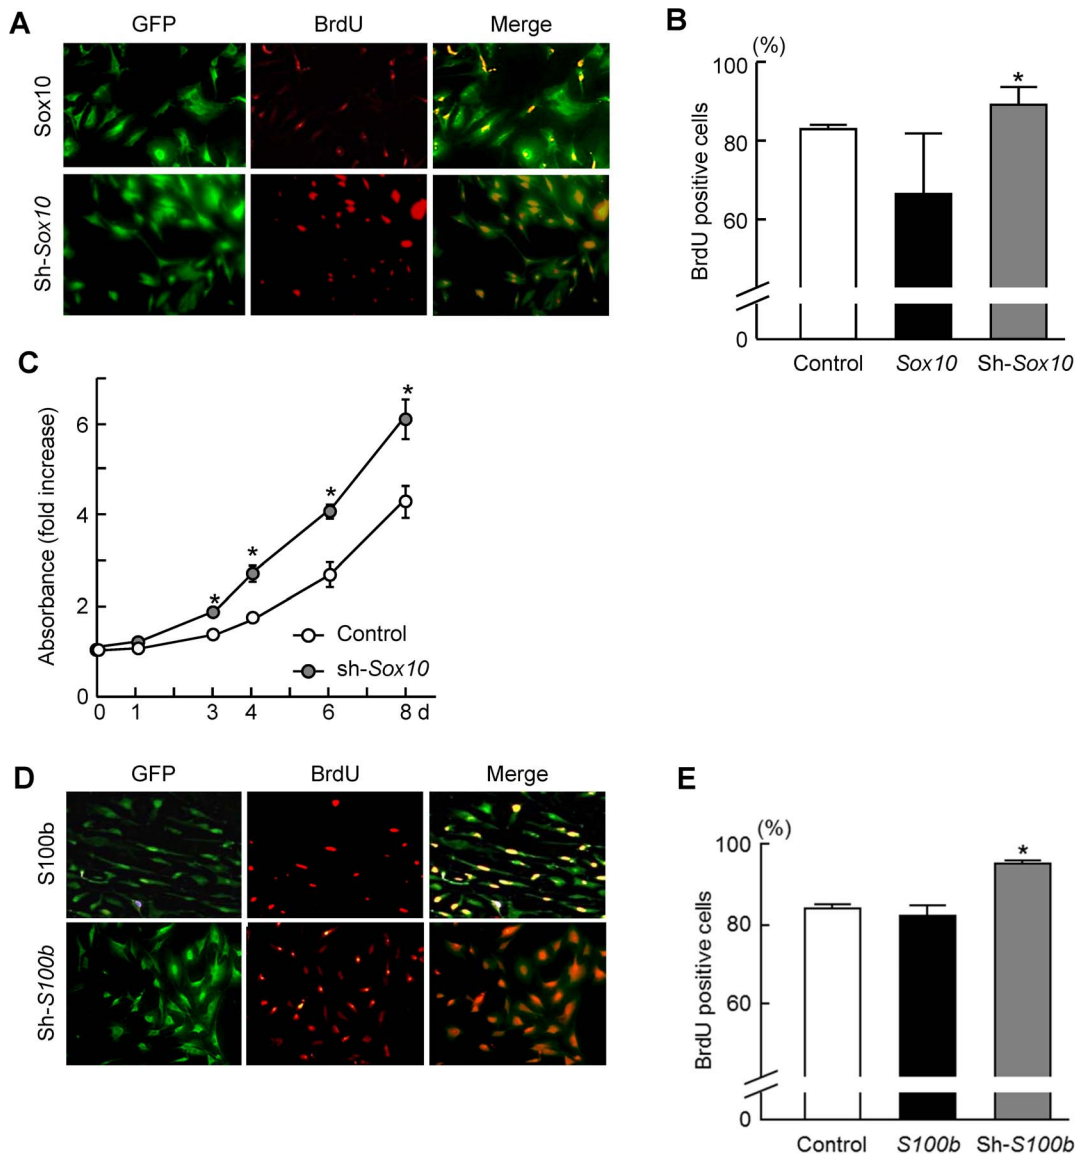

**Fig. 7. Enhanced proliferation by knockdown of Sox10 or S100b in Schwann cells.** (A, B) BrdU labeling of stable lines of Schwann cells retrovirally transfected with SOX10 or shRNA specific for SOX10 and GFP (A). Ratio of BrdU-positive cells to total cells was quantified after 3 d culture of stable lines of Schwann cells transfected with Sox10 expressing vector, shRNA vector specific for Sox10, and control GFP vector (B). (C) Growth curves using the CCK-8 assay of stable lines of Schwann cells retrovirally transfected with sh-Sox10 or control GFP. Experiments were repeated independently three times with data shown as the mean  $\pm$  SEM. \* $P < 0.05$  versus control. (D, E) BrdU labeling of stable lines of Schwann cells retrovirally transfected with S100b or shRNA specific for S100b and GFP (D). Ratio of BrdU-positive cells to total cells were quantified after 3-day-old cultures of stable lines of Schwann cells were transfected with S100b expressing vector, shRNA vector specific for S100b, and control GFP vector (E). Experiments were repeated independently three times with data shown as the mean  $\pm$  SEM. \* $P < 0.05$  versus control.

doi:10.1371/journal.pone.0115400.g007

negatively regulate cell-cycle progression in Schwann cells by activating inhibitors of Cdks.

We also show that S100B is involved in Schwann cell myelination (Fig. 9). Our findings confirm a previous study that found that myelination is delayed in S100b-deficient mice [50]. How S100B functions to stimulate Schwann cell myelination

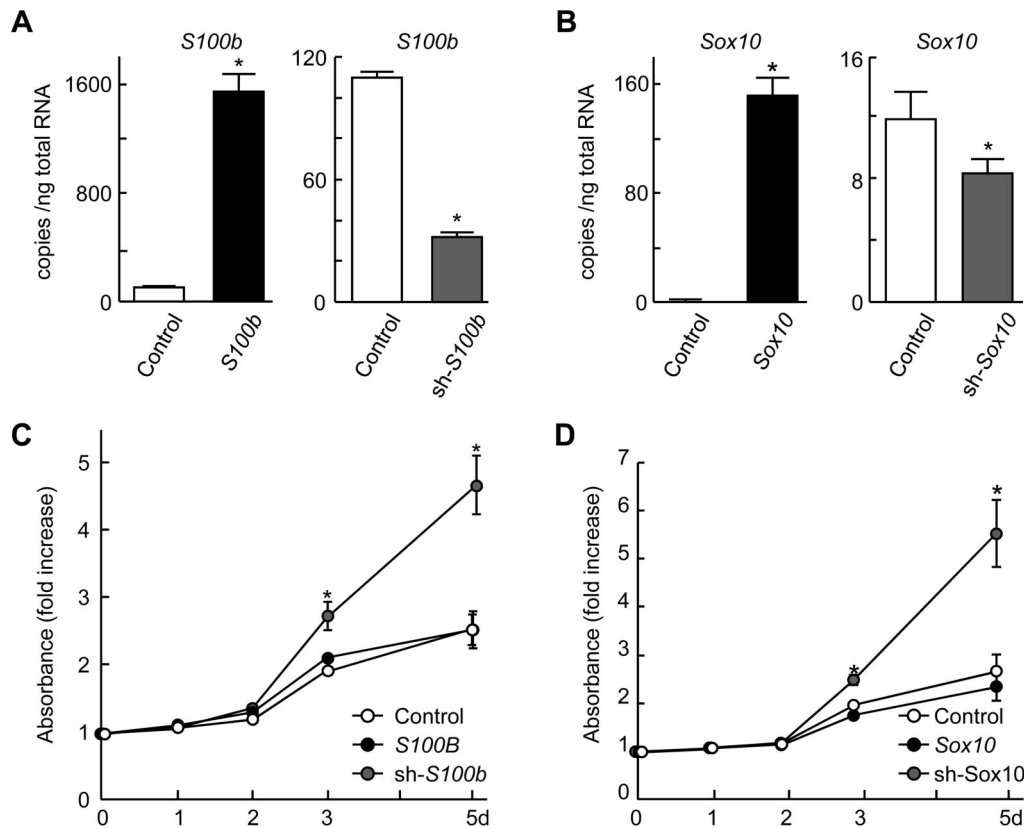

**Fig. 8. Enhanced proliferation by knockdown of *S100b* or *Sox10* in C3H10T1/2 cells.** (A) mRNA levels of *S100b* determined by real-time RT-PCR in stable lines of mouse mesenchymal C3H10T1/2 cells retrovirally transfected with *S100b*, shRNA for *S100b*, or control *GFP*. (B) mRNA levels of *Sox10* determined by real-time RT-PCR in stable lines of mouse mesenchymal C3H10T1/2 cells retrovirally transfected with *Sox10*, shRNA for *Sox10*, or control *GFP*. (C and D) Growth curves using the CCK-8 assay of stable lines of C3H10T1/2 cells as mentioned above. All experiments were repeated independently three times with data shown as the mean  $\pm$  SEM. \* $P < 0.05$  versus control.

doi:10.1371/journal.pone.0115400.g008

is still unclear. Recent work suggests that because S100B is a  $Ca^{2+}$  binding protein, S100B controls intracellular  $Ca^{2+}$  concentration crucial for myelination induced by neuregulin-dependent phosphorylation of calcineurin. Neuregulin signaling controls myelination by increasing  $Ca^{2+}$  levels in Schwann cells in order to activate the phosphatase calcineurin [51, 52]. Thus, because  $Ca^{2+}$  levels regulate myelination, as a  $Ca^{2+}$  binding protein, S100B may also influence myelination in Schwann cells.

We conclude that SOX10 directly transactivates S100B to inhibit proliferation and to promote myelination during Schwann cell differentiation. It has been reported that the function of S100B changes depending on its expression levels. While at nanomolar levels S100B promotes axon extension via RAGE receptors, at millimolar levels S100B triggers apoptosis in neurons. Furthermore, S100B expression levels can indicate the malignant grade of malignant tumors [11, 53]. Together, these lines of evidence suggest that modulating the SOX10-S100B axis may be a viable therapeutic target for various neuronal disorders including demyelinating disease, neuropathy, and nerve injury.

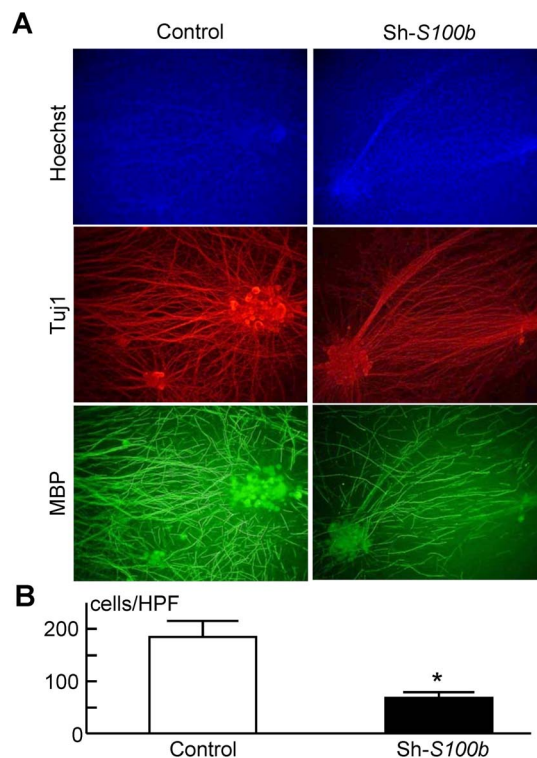

**Fig. 9. Impaired myelination by knockdown of *S100b*.** (A) Immunocytochemistry of neurons and stable lines of Schwann cells retrovirally transfected with shRNA specific for *S100b* or control *GFP* in DRG dissociated cultures. Staining of Tuj1 (red), MBP (green) and Hoechst (blue) in neurons, Schwann cells, and nuclei, respectively. (B) The number of MBP-positive Schwann cells in a high-power field of the immunocytochemistry as in Fig. 9A. Experiments were repeated independently three times with data shown as the mean  $\pm$  SEM. \* $P < 0.05$  versus control.

doi:10.1371/journal.pone.0115400.g009

## Acknowledgments

We thank R. Yamaguchi and H. Kawahara for excellent technical assistance.

## Author Contributions

Conceived and designed the experiments: SF SH HK KN ST TO. Performed the experiments: SF SH TU MH. Analyzed the data: SF SH TU MH. Contributed reagents/materials/analysis tools: SF SH TU MH TS TI. Wrote the paper: SF MH ST TO.

## References

1. Ogata T, Iijima S, Hoshikawa S, Miura T, Yamamoto S, et al. (2004) Opposing extracellular signal-regulated kinase and Akt pathways control Schwann cell myelination. *J Neurosci* 24: 6724–6732.
2. Bhatheja K, Field J (2006) Schwann cells: origins and role in axonal maintenance and regeneration. *Int J Biochem Cell Biol* 38: 1995–1999.
3. Kioussi C, Gruss P (1996) Making of a Schwann. *Trends Genet* 12: 84–86.

4. **Haldin CE, LaBonne C** (2010) SoxE factors as multifunctional neural crest regulatory factors. *Int J Biochem Cell Biol* 42: 441–444.
5. **Stolt CC, Wegner M** (2010) SoxE function in vertebrate nervous system development. *Int J Biochem Cell Biol* 42: 437–440.
6. **Wegner M, Stolt CC** (2005) From stem cells to neurons and glia: a Soxist's view of neural development. *Trends Neurosci* 28: 583–588.
7. **Kuhlbrodt K, Herbarth B, Sock E, Hermans-Borgmeyer I, Wegner M** (1998) Sox10, a novel transcriptional modulator in glial cells. *J Neurosci* 18: 237–250.
8. **Donato R** (1999) Functional roles of S100 proteins, calcium-binding proteins of the EF-hand type. *Biochim Biophys Acta* 1450: 191–231.
9. **Selinfreund RH, Barger SW, Pledger WJ, Van Eldik LJ** (1991) Neurotrophic protein S100 beta stimulates glial cell proliferation. *Proc Natl Acad Sci U S A* 88: 3554–3558.
10. **Azmitia EC, Dolan K, Whitaker-Azmitia PM** (1990) S-100B but not NGF, EGF, insulin or calmodulin is a CNS serotonergic growth factor. *Brain Res* 516: 354–356.
11. **Donato R, Sorci G, Riuzzi F, Arcuri C, Bianchi R, et al.** (2009) S100B's double life: intracellular regulator and extracellular signal. *Biochim Biophys Acta* 1793: 1008–1022.
12. **Mrak RE, Griffin WS** (2004) Trisomy 21 and the brain. *J Neuropathol Exp Neurol* 63: 679–685.
13. **Tateishi N, Shimoda T, Yada N, Shinagawa R, Kagamiishi Y** (2006) [S100B: astrocyte specific protein]. *Nihon Shinkei Seishin Yakurigaku Zasshi* 26: 11–16.
14. **Allore R, O'Hanlon D, Price R, Neilson K, Willard HF, et al.** (1988) Gene encoding the beta subunit of S100 protein is on chromosome 21: implications for Down syndrome. *Science* 239: 1311–1313.
15. **Gonzalez-Martinez T, Perez-Pinera P, Diaz-Esnal B, Vega JA** (2003) S-100 proteins in the human peripheral nervous system. *Microsc Res Tech* 60: 633–638.
16. **Jessen KR, Mirsky R** (2002) Signals that determine Schwann cell identity. *J Anat* 200: 367–376.
17. **Saito T, Ikeda T, Nakamura K, Chung UI, Kawaguchi H** (2007) S100A1 and S100B, transcriptional targets of SOX trio, inhibit terminal differentiation of chondrocytes. *EMBO Rep* 8: 504–509.
18. **Roh J, Cho EA, Seong I, Limb JK, Lee S, et al.** (2006) Down-regulation of Sox10 with specific small interfering RNA promotes transdifferentiation of Schwannoma cells into myofibroblasts. *Differentiation* 74: 542–551.
19. **Inoue K, Shilo K, Boerkoel CF, Crowe C, Sawady J, et al.** (2002) Congenital hypomyelinating neuropathy, central dysmyelination, and Waardenburg-Hirschsprung disease: phenotypes linked by SOX10 mutation. *Ann Neurol* 52: 836–842.
20. **Verheij JB, Sival DA, van der Hoeven JH, Vos YJ, Meiners LC, et al.** (2006) Shah-Waardenburg syndrome and PCWH associated with SOX10 mutations: a case report and review of the literature. *Eur J Paediatr Neurol* 10: 11–17.
21. **Shimotake T, Tanaka S, Fukui R, Makino S, Maruyama R** (2007) Neuroglial disorders of central and peripheral nervous systems in a patient with Hirschsprung's disease carrying allelic SOX10 truncating mutation. *J Pediatr Surg* 42: 725–731.
22. **Mathon NF, Malcolm DS, Harrisingh MC, Cheng L, Lloyd AC** (2001) Lack of replicative senescence in normal rodent glia. *Science* 291: 872–875.
23. **Yano F, Kugimiya F, Ohba S, Ikeda T, Chikuda H, et al.** (2005) The canonical Wnt signaling pathway promotes chondrocyte differentiation in a Sox9-dependent manner. *Biochem Biophys Res Commun* 333: 1300–1308.
24. **Kitamura T** (1998) New experimental approaches in retrovirus-mediated expression screening. *Int J Hematol* 67: 351–359.
25. **Ikeda T, Kamekura S, Mabuchi A, Kou I, Seki S, et al.** (2004) The combination of SOX5, SOX6, and SOX9 (SOX Trio) provides signals sufficient for induction of permanent cartilage. *Arthritis Rheum* 50: 3561–3573.
26. **Einheber S, Hannocks MJ, Metz CN, Rifkin DB, Salzer JL** (1995) Transforming growth factor-beta 1 regulates axon/Schwann cell interactions. *J Cell Biol* 129: 443–458.

27. **Srinivasan R, Sun G, Keles S, Jones EA, Jang SW, et al.** (2012) Genome-wide analysis of EGR2/SOX10 binding in myelinating peripheral nerve. *Nucleic acids research* 40: 6449–6460.
28. **Monuki ES, Weinmaster G, Kuhn R, Lemke G** (1989) SCIP: a glial POU domain gene regulated by cyclic AMP. *Neuron* 3: 783–793.
29. **Paratore C, Goerich DE, Suter U, Wegner M, Sommer L** (2001) Survival and glial fate acquisition of neural crest cells are regulated by an interplay between the transcription factor Sox10 and extrinsic combinatorial signaling. *Development* 128: 3949–3961.
30. **Finzsch M, Schreiner S, Kichko T, Reeh P, Tamm ER, et al.** (2010) Sox10 is required for Schwann cell identity and progression beyond the immature Schwann cell stage. *J Cell Biol* 189: 701–712.
31. **Bondurand N, Girard M, Pingault V, Lemort N, Dubourg O, et al.** (2001) Human Connexin 32, a gap junction protein altered in the X-linked form of Charcot-Marie-Tooth disease, is directly regulated by the transcription factor SOX10. *Hum Mol Genet* 10: 2783–2795.
32. **Ito Y, Wiese S, Funk N, Chittka A, Rossoll W, et al.** (2006) Sox10 regulates ciliary neurotrophic factor gene expression in Schwann cells. *Proc Natl Acad Sci U S A* 103: 7871–7876.
33. **Lang D, Epstein JA** (2003) Sox10 and Pax3 physically interact to mediate activation of a conserved c-RET enhancer. *Hum Mol Genet* 12: 937–945.
34. **Ludwig A, Rehberg S, Wegner M** (2004) Melanocyte-specific expression of dopachrome tautomerase is dependent on synergistic gene activation by the Sox10 and Mitf transcription factors. *FEBS Lett* 556: 236–244.
35. **Melnikova IN, Yang Y, Gardner PD** (2000) Interactions between regulatory proteins that bind to the nicotinic receptor beta4 subunit gene promoter. *Eur J Pharmacol* 393: 75–83.
36. **Peirano RI, Goerich DE, Riethmacher D, Wegner M** (2000) Protein zero gene expression is regulated by the glial transcription factor Sox10. *Mol Cell Biol* 20: 3198–3209.
37. **Reiprich S, Kriesch J, Schreiner S, Wegner M** (2010) Activation of Krox20 gene expression by Sox10 in myelinating Schwann cells. *J Neurochem* 112: 744–754.
38. **Schlierf B, Werner T, Glaser G, Wegner M** (2006) Expression of connexin47 in oligodendrocytes is regulated by the Sox10 transcription factor. *J Mol Biol* 361: 11–21.
39. **Verastegui C, Bille K, Ortonne JP, Ballotti R** (2000) Regulation of the microphthalmia-associated transcription factor gene by the Waardenburg syndrome type 4 gene, SOX10. *J Biol Chem* 275: 30757–30760.
40. **Bowles J, Schepers G, Koopman P** (2000) Phylogeny of the SOX family of developmental transcription factors based on sequence and structural indicators. *Dev Biol* 227: 239–255.
41. **Wegner M** (1999) From head to toes: the multiple facets of Sox proteins. *Nucleic Acids Res* 27: 1409–1420.
42. **Schepers GE, Bullejos M, Hosking BM, Koopman P** (2000) Cloning and characterisation of the Sry-related transcription factor gene Sox8. *Nucleic Acids Res* 28: 1473–1480.
43. **Sock E, Schmidt K, Hermanns-Borgmeyer I, Bosl MR, Wegner M** (2001) Idiopathic weight reduction in mice deficient in the high-mobility-group transcription factor Sox8. *Mol Cell Biol* 21: 6951–6959.
44. **Ghislain J, Charnay P** (2006) Control of myelination in Schwann cells: a Krox20 cis-regulatory element integrates Oct6, Brn2 and Sox10 activities. *EMBO Rep* 7: 52–58.
45. **Donato R** (2003) Intracellular and extracellular roles of S100 proteins. *Microsc Res Tech* 60: 540–551.
46. **Salama I, Malone PS, Mihaimed F, Jones JL** (2008) A review of the S100 proteins in cancer. *Eur J Surg Oncol* 34: 357–364.
47. **Atanasoski S, Boentert M, De Ventura L, Pohl H, Baranek C, et al.** (2008) Postnatal Schwann cell proliferation but not myelination is strictly and uniquely dependent on cyclin-dependent kinase 4 (cdk4). *Mol Cell Neurosci* 37: 519–527.
48. **Arcuri C, Bianchi R, Brozzi F, Donato R** (2005) S100B increases proliferation in PC12 neuronal cells and reduces their responsiveness to nerve growth factor via Akt activation. *J Biol Chem* 280: 4402–4414.



49. **Wei Q, Miskimins WK, Miskimins R** (2004) Sox10 acts as a tissue-specific transcription factor enhancing activation of the myelin basic protein gene promoter by p27<sup>Kip1</sup> and Sp1. *J Neurosci Res* 78: 796–802.
50. **Nishiyama H, Takemura M, Takeda T, Itohara S** (2002) Normal development of serotonergic neurons in mice lacking S100B. *Neurosci Lett* 321: 49–52.
51. **Jessen KR, Mirsky R** (2010) Control of Schwann cell myelination. *F1000 Biol Rep* 2: 19.
52. **Kao SC, Wu H, Xie J, Chang CP, Ranish JA, et al.** (2009) Calcineurin/NFAT signaling is required for neuregulin-regulated Schwann cell differentiation. *Science* 323: 651–654.
53. **Marenholz I, Heizmann CW, Fritz G** (2004) S100 proteins in mouse and man: from evolution to function and pathology (including an update of the nomenclature). *Biochem Biophys Res Commun* 322: 1111–1122.
